# Supplementary material
Source: publisher figshare collection journal article supplement (https://acs.figshare.com/ndownloader/files/4572595)
Supplement: Supplementary file 1 [file 4572595]

## Supporting Information

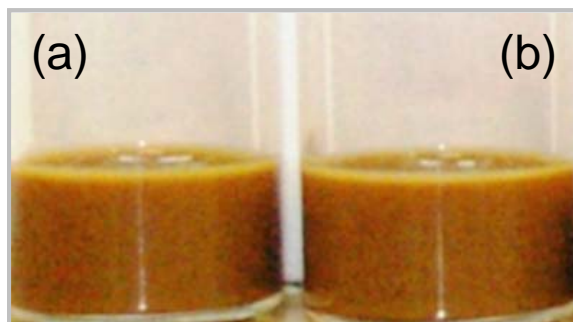

Photograph of (a) magnetite/emulsion mixture and (b) magnetite/ polymer nanocomposites
